# Supplementary material for: A systematic scoping review of the genetic ancestry of the Brazilian population
Source: PubMed Central journal article supplement (PMC6905439; doi:10.1590/1678-4685-gmb-2018-0076), 2019-11-14
Supplement: 1415-4757-GMB-42-3-2018-0076-suppl2.pdf [file 1415-4757-GMB-42-3-2018-0076-suppl2.pdf]

## Supplementary Material to “A systematic scoping review of the genetic ancestry of the Brazilian population”

**Table S2** - Characterization of the 51 manuscripts included in the scoping review.

| Region      | State              | City         | N         | EUR     | AFR | NAM | Number of markers | Molecular marker type | Reference |
|-------------|--------------------|--------------|-----------|---------|-----|-----|-------------------|-----------------------|-----------|
| Center-West | Distrito Federal   | Brasília     | 200       | 77      | 14  | 9   | 28                | SNP                   | 4         |
|             |                    |              | 168       | 61      | 23  | 16  | 15                | Alu/SNP/INDEL         | 2         |
|             |                    |              | 412       | 57      | 29  | 14  | 12                | SNP                   | 3         |
|             | Mato Grosso do sul | Taguatinga   | 189       | 63      | 25  | 12  | 13                | SNP                   | 1         |
|             |                    | NI           | 84        | 59      | 26  | 15  | 46                | INDEL                 | 5         |
| North       | Para               | Belém*       | 167       | 40      | 30  | 30  | 8                 | SNP                   | 6         |
|             |                    |              | 203       | 70      | 11  | 19  | 40                | INDEL                 | 7         |
|             |                    |              | 226       | 54      | 16  | 30  | 46                | INDEL                 | 8         |
|             |                    |              | 196       | 61      | 12  | 27  | 48                | INDEL                 | 9         |
|             |                    |              | 125       | 50      | 21  | 29  | 48                | INDEL                 | 10        |
|             |                    |              | 127       | 52      | 20  | 28  | 48                | INDEL                 | 11        |
|             |                    |              | 210       | 45      | 23  | 32  | 62                | INDEL                 | 12        |
|             |                    |              | 90        | 60      | 11  | 29  | 40                | INDEL                 | 13        |
|             |                    |              | 273       | 44      | 32  | 24  | 48                | INDEL                 | 14        |
|             |                    |              | Amapá     | Macapá# | 130 | 50  | 29                | 21                    | 48        |
|             | 307                | 46           |           |         | 19  | 35  | 12                | STR                   | 16        |
|             | Amazonas           | Manaus*      | 252       | 71      | 12  | 17  | 12                | STR                   | 17        |
|             |                    |              | 42        | 46      | 16  | 38  | 46                | INDEL                 | 5         |
|             | Rondônia           | Porto Velho* | Rio Pardo | 340     | 44  | 18  | 38                | 48                    | SNP       |
|             |                    |              | 122       | 60      | 30  | 11  | 4                 | STR                   | 19        |

| Region     | State    | City       | N       | EUR    | AFR    | NAM | Number of markers | Molecular marker type | Reference     |    |       |    |
|------------|----------|------------|---------|--------|--------|-----|-------------------|-----------------------|---------------|----|-------|----|
|            |          |            | 282     | 54     | 18     | 28  | 62                | SNP/INDEL             | 20            |    |       |    |
| Northeast  | Ceará    | Barbalha   | 60      | 68     | 19     | 13  | 40                | INDEL                 | 13            |    |       |    |
|            |          | Fortaleza* | 216     | 71     | 13     | 16  | 40                | INDEL                 | 13            |    |       |    |
|            |          |            | 616     | 49     | 16     | 35  | 237               | SNP                   | 21            |    |       |    |
|            |          |            | 110     | 53     | 22     | 25  | 199654            | SNP                   | 22            |    |       |    |
|            |          |            | 276     | 54     | 22     | 24  | 199654            | SNP                   | 22            |    |       |    |
|            |          |            | 336     | 52     | 23     | 25  | 199654            | SNP                   | 22            |    |       |    |
|            |          |            | 95      | 55     | 22     | 23  | 199654            | SNP                   | 22            |    |       |    |
|            |          |            | 63      | 54     | 21     | 25  | 199654            | SNP                   | 22            |    |       |    |
|            | Bahia    | Salvador#  | 206     | 80     | 18     | 2   | 40                | INDEL                 | 23            |    |       |    |
|            |          |            | 852     | 63     | 34     | 3   | 40                | INDEL                 | 24            |    |       |    |
|            |          |            | 1309    | 43     | 51     | 6   | 331790            | SNP                   | 25            |    |       |    |
|            |          |            | 511     | 51     | 40     | 9   | 237               | SNP                   | 21            |    |       |    |
|            |          |            | 203     | 45     | 45     | 10  | 9                 | INDEL*                | 26            |    |       |    |
|            |          |            | 203     | 59     | 33     | 8   | 8                 | STR*                  | 26            |    |       |    |
|            |          |            | 289     | 44     | 49     | 7   | 7                 | Alu/INDEL/RFLP        | 27            |    |       |    |
|            |          |            | 1286    | 36     | 49     | 15  | 10                | Alu/INDEL/SNP         | 28            |    |       |    |
|            |          |            | Ilheus  | 109    | 61     | 33  | 6                 | 11                    | Alu/INDEL/SNP | 29 |       |    |
|            |          |            |         | 147    | 61     | 30  | 9                 | 40                    | INDEL         | 7  |       |    |
|            |          |            | Alagoas | Maceio | Jequie | 20  | 44                | 42                    | 11            | 8  | SNP   | 30 |
|            |          |            |         |        | NI     | 120 | 67                | 19                    | 14            | 40 | INDEL | 13 |
| Maranhão   | São Luís | NI         | 104     | 55     | 27     | 19  | 46                | INDEL                 | 5             |    |       |    |
|            |          | NI         | 177     | 42     | 19     | 39  | 4                 | STR                   | 31            |    |       |    |
| Piauí      | NI       | 204        | 60      | 22     | 18     | 46  | INDEL             | 32                    |               |    |       |    |
| Pernambuco | NI       | 133        | 57      | 28     | 15     | 46  | INDEL             | 5                     |               |    |       |    |

| Region    | State             | City                      | N    | EUR | AFR | NAM    | Number of markers | Molecular marker type | Reference |   |
|-----------|-------------------|---------------------------|------|-----|-----|--------|-------------------|-----------------------|-----------|---|
|           |                   | Recife                    | 192  | 60  | 23  | 17     | 12                | SNP                   | 33        |   |
| South     | Rio Grande do Sul | Porto Alegre <sup>#</sup> | 226  | 82  | 11  | 7      | 12                | STR                   | 17        |   |
|           |                   |                           | 6782 | 85  | 4   | 9      | 48                | INDEL                 | 34        |   |
|           |                   |                           | 189  | 78  | 13  | 9      | 40                | INDEL                 | 7         |   |
|           |                   | Pelotas                   | 3736 | 76  | 16  | 8      | 331790            | SNP                   | 25        |   |
|           |                   | NI                        | 81   | 95  | 1   | 4      | 48                | INDEL                 | 9         |   |
|           |                   | NI                        | 23   | 73  | 14  | 13     | 46                | INDEL                 | 5         |   |
|           |                   | Paraná                    | NI   | 21  | 71  | 17     | 12                | 46                    | INDEL     | 5 |
|           |                   | Santa Catarina            | NI   | 20  | 80  | 11     | 9                 | 46                    | INDEL     | 5 |
| Southeast | Espirito Santo    | NI                        | 92   | 74  | 13  | 13     | 46                | INDEL                 | 5         |   |
|           | Minas Gerais      | Belo Horizonte*           | 234  | 65  | 34  | 1      | 13                | STR                   | 35        |   |
|           |                   |                           | 90   | 76  | 15  | 10     | 40                | INDEL                 | 36        |   |
|           |                   | Alfenas                   | 299  | 89  | 9   | 2      | 40                | INDEL                 | 23        |   |
|           |                   |                           | 459  | 87  | 11  | 2      | 40                | INDEL                 | 37        |   |
|           |                   | NI                        | 88   | 59  | 29  | 12     | 46                | INDEL                 | 5         |   |
|           |                   | NI                        | 291  | 58  | 34  | 4      | 54                | SNP/INDEL             | 38        |   |
|           |                   | Manhuaçu                  | 30   | 63  | 27  | 9      | 14                | SNP                   | 39        |   |
|           |                   | Montes Claros             | 24   | 54  | 41  | 5      | 14                | SNP                   | 39        |   |
|           |                   | Ouro Preto                | 189  | 50  | 33  | 16     | 15                | SNP                   | 40        |   |
|           | Bambui            | 1442                      | 79   | 14  | 7   | 331790 | SNP               | 25                    |           |   |

| Region | State          | City           | N    | EUR | AFR | NAM | Number of markers | Molecular marker type | Reference |
|--------|----------------|----------------|------|-----|-----|-----|-------------------|-----------------------|-----------|
|        | São Paulo      | NI             | 49   | 63  | 25  | 12  | 46                | INDEL                 | 5         |
|        |                | Araraquara     | 403  | 76  | 18  | 6   | 15                | STR                   | 41        |
|        |                | São Paulo#     | 326  | 71  | 19  | 10  | 40                | INDEL                 | 37        |
|        |                |                | 145  | 73  | 10  | 7   | 48                | SNP                   | 42        |
|        |                |                | 362  | 58  | 33  | 9   | 101348            | SNP                   | 43        |
|        |                |                | 503  | 58  | 28  | 14  | 48                | INDEL                 | 44        |
|        |                |                | 1010 | 75  | 19  | 6   | 31                | SNP                   | 45        |
|        |                | Botucatu       | 593  | 80  | 8   | 7   | 61                | INDEL                 | 46        |
|        |                |                | 390  | 67  | 16  | 12  | 61                | INDEL                 | 47        |
|        |                | Campinas       | 109  | 73  | 20  | 7   | 12                | STR                   | 17        |
|        |                | Ribeirão Preto | 448  | 86  | 9   | 4   | 48                | INDEL                 | 48        |
|        | Rio de Janeiro | Rio de Janeiro | 116  | 65  | 23  | 12  | 40                | INDEL                 | 13        |
|        |                |                | 413  | 55  | 31  | 14  | 46                | INDEL                 | 49        |
|        |                |                | 264  | 74  | 19  | 7   | 40                | INDEL                 | 7         |
|        |                |                | 87   | 74  | 20  | 7   | 40                | INDEL                 | 50        |
|        |                | NI             | 335  | 65  | 28  | 7   | 40                | INDEL                 | 51        |

\*Significant differences comparing ancestry estimates by different molecular markers (Spearman's test,  $p < 0.05$ ). #Not significant differences comparing the two sets of markers. References: 1. Lins *et al.*, 2011a; 2. Gontijo *et al.*, 2014, 3. Bened Morais *et al.*, 2012; 4. Lins *et al.*, 2011b; 5. Manta *et al.*, 2013b; 6. Cardoso *et al.*, 2014, 7. Pena *et al.*, 2011; 8. Pereira *et al.*, 2012; 9. Santos *et al.*, 2010; 10. Carvalho *et al.*, 2015; 11. Vieira *et al.*, 2015; 12. Vieira-Machado *et al.*, 2016; 13. Brito *et al.*, 2011; 14. Cassiano *et al.*, 2015; 15. Francez *et al.*, 2011; 16. Francez *et al.*, 2012; 17. Callegari-Jacques *et al.*, 2003; 18. Kano *et al.*, 2016; 19. França, 2005; 20. Tarazona-Santos *et al.*, 2011; 21. Silva *et al.*, 2015; 22. Mychaleckyj *et al.*, 2017; 23. Aquino *et al.*, 2014; 24. do Rego Borges *et al.*, 2015; 25. Kehdy *et al.*, 2015; 26. Teló, 2010; 27. Felix *et al.*, 2010; 28. Machado, 2008; 29. Oliveira *et al.*, 2016; 30. Nascimento *et al.*, 2016; 31. Ferreira *et al.*, 2002; 32. Lopes *et al.*, 2014; 33. Coelho *et al.*, 2015; 34. Wagner *et al.*, 2016; 35. Scliar *et al.*, 2009; 36. Rolim *et al.*, 2016; 37. Brito *et al.*, 2012; 38. Silva *et al.*, 2011; 39. Silva *et al.*, 2010; 40. Queiroz *et al.*, 2013; 41. Martins *et al.*, 2011; 42. Nastri *et al.*, 2016; 43. Bermardez-Pereira *et al.*, 2016; 44. Cardena *et al.*, 2013; 45. Guindalini, 2010; 46. D'Éllia *et al.*, 2017; 47. Ramos *et al.*, 2016; 48. Souza *et al.*, 2015; 49. Manta *et al.*, 2013a 52. Santos *et al.*, 2009; 51. Suarez-Kurtz *et al.*, 2007.

**References exclusively cited in this table:**

Felix GES, Abe-Sandes K, Bonfim TM, Bendicho MT, Cisneiros P, Guedes R, Brandão CJF, Torres AJL, Brites C, Netto EM *et al.* (2010) Ancestry informative markers and complete blood count parameters in Brazilian blood donors. *Rev Bras Hematol Hemoter* 32:282-285.

Machado TMB (2008) Ancestralidade em Salvador – BA. M. Sc. Thesis, Fundação Oswaldo Cruz, Centro de Pesquisas Gonçalo Moniz, Salvador, 86 p.

Oliveira JS, Ferreira RS, Santos LM, Marin LJ, Corrêa RX, Luizon MR, Simões AL, Gadelha SR and Sousa SM (2016) Self-declared ethnicity and genomic ancestry in prostate cancer patients from Brazil. *Genet Mol Res* 15:15048769.

Tarazona-Santos E, Castilho L, Amaral DR, Costa DC, Furlani NG, Zuccherato LW, Machado M, Reid ME, Zalis MG, Rossit AR *et al.* (2011) Population genetics of GYPB and association study between GYPB\*S/s polymorphism and susceptibility to *P. falciparum* infection in the Brazilian Amazon. *PLoS One* 6:e16123.
